# Supplementary material for: Transcriptional Profiling in Rat Hair Follicles following Simulated Blast Insult: A New Diagnostic Tool for Traumatic Brain Injury
Source: PLoS One. 2014 Aug 19;9(8):e104518. doi: 10.1371/journal.pone.0104518 (PMC4138085; doi:10.1371/journal.pone.0104518)
Supplement: Appendix S4 — A: SENA analysis. Appendix S4B: SNEA diease analysis. (XLSX) [file pone.0104518.s011.xlsx]

## Sheet: Appendix 4A
Appendix 4A: SENA analysis
Gene Set Seed	Total # of Neighbors	# of Measured Neighbors	p-value	Median change
complement activation	143	127	5.76944e-07	-1.07677
regulation of action potential	184	182	1.34914e-05	-1.00917
membrane polarization	117	113	2.16771e-05	-1.06563
vasoconstriction	295	287	4.66174e-05	-1.0054
myocyte function	93	89	5.78241e-05	1.02297
tissue regeneration	101	96	5.85717e-05	-1.1022
acid secretion	132	129	6.52894e-05	-1.08438
neurotransmitter uptake	163	160	6.72234e-05	-1.02449
liver blood flow	34	34	7.69722e-05	-1.23855
macrophage chemotaxis	72	70	8.45588e-05	-1.05844
cardiovascular function	102	102	0.000119122	1.03536
dopamine release	160	158	0.000132774	-1.00917
ganglion neurotransmission	21	21	0.000142084	-1.2848
blood vessel permeability	300	291	0.000147961	-1.00908
vasodilation	396	385	0.000202607	1.02157
chloride ion homeostasis	100	99	0.000206093	-1.13414
regional blood flow	26	25	0.000290774	1.21772
endothelial cell proliferation	432	407	0.000376543	-1.06927
cerebellum development	14	12	0.000407884	1.22236
peristalsis	44	44	0.000446214	1.02148
tissue remodeling	230	216	0.000457844	-1.04873
HCO(3)(-) transport	116	115	0.000475744	-1.00282
arteriogenesis	103	101	0.000501692	1.03536
fibrinolysis	148	141	0.000535313	1.02047
blood clotting	493	470	0.000588862	-1.0422
diuresis	93	92	0.000621443	-1.02449
blood circulation	390	381	0.000633875	1.01046
membrane depolarization	631	609	0.000649955	-1.04468
water transport	170	167	0.00066835	-1.02449
respiratory gaseous exchange	79	79	0.000683091	-1.01988
neutrophil degranulation	50	45	0.000700833	-1.00462
generation of action potential	75	75	0.000734846	1.03594
pregnancy	981	920	0.000783989	-1.03091
capillary growth	36	34	0.000794642	-1.05844
leukocyte migration	408	379	0.000831784	1.02879
operant conditioning	6	6	0.00084179	-2.22855
gastrointestinal motility	84	82	0.000846286	-1.00808
hemolysis	106	99	0.000869903	1.02297
kidney blood flow	130	127	0.000873287	-1.01779
pancreas blood flow	31	31	0.000877267	-1.05844
artery blood flow	80	80	0.000892598	-1.05844
neuronal activity	263	259	0.000904723	-1.01142
ECM degradation	160	148	0.000932027	-1.12228
perception of pain	182	180	0.00104098	-1.01469
hemostasis	147	140	0.00112439	1.05607
calcium-mediated signaling	155	149	0.00129162	-1.00917
parietal cell function	14	14	0.00137911	1.5522
endothelial cell function	338	320	0.00140208	-1.01593
ovary function	106	103	0.00141236	-1.05844
muscle blood flow	26	24	0.00147167	-1.06521
leukocyte function	158	152	0.00148433	1.07657
bone remodeling	234	229	0.00166915	-1.05844
transmission of nerve impulse	592	580	0.00169824	-1.02504
action potential duration	94	92	0.00173028	1.06181
anagen	142	135	0.00178433	-1.09448
innervation	172	168	0.00183099	-1.02915
lung blood flow	56	55	0.0018442	-1.15137
endochondral ossification	112	106	0.00188955	-1.10829
water balance	64	64	0.00192334	-1.09435
intestine barrier	70	68	0.00195671	-1.17026
grooming behavior	29	29	0.00200369	-1.23545
membrane hyperpolarization	285	283	0.00203313	-1.01469
hemato-encephalic barrier	215	212	0.00203463	1.04269
hindbrain development	15	15	0.00211911	-1.22341
opsinization	42	38	0.00214216	-1.03278
collateral circulation	18	18	0.00228532	1.32697
monocyte recruitment	140	130	0.00237433	1.06441
neuromuscular synaptic transmission	41	39	0.00243245	1.12476
arachidonic acid metabolism	70	67	0.00279877	1.0306
complement activation, classical pathway	59	50	0.0028	-1.02827
bone resorption	359	349	0.00283451	-1.04158
endothelial cell adhesion	230	218	0.00283956	1.03705
copulation	13	11	0.00286641	-1.311
maternal behavior	26	23	0.0029477	-1.311
synaptic transmission	506	491	0.00296891	-1.03191
fluid secretion	101	100	0.0030354	-1.06743
micturition	43	43	0.00314388	1.14693
K+ import/homeostasis	67	67	0.0033816	-1.09143
natriuresis	103	101	0.00347667	1.00096
intestine secretion	42	41	0.00356209	-1.00917
Cl- transport	254	247	0.00359155	-1.03894
ossification	534	502	0.00359342	-1.09599
peripheral nerve function	147	146	0.00364602	-1.02449
Glycan catabolism	35	35	0.0038544	1.20412
synaptogenesis	202	196	0.00396663	-1.06625
vascular blood flow	19	18	0.00412784	1.06441
learning	305	297	0.00418789	-1.00917
ovulation	239	227	0.00450653	-1.03999
hair cycle	63	60	0.00463483	1.03309
phagocyte activity	167	157	0.00474462	1.01952
sarcoplasmic reticulum calcium release	45	41	0.00481499	-1.03958
artery remodeling	80	77	0.00501533	1.01307
NO biosynthesis	312	304	0.00540469	1.02627
gastric acid secretion	136	132	0.00574885	-1.06743
chondrogenesis	277	266	0.00627476	-1.08212
placenta blood flow	38	38	0.00633855	-1.06521
intestine motility	89	89	0.00647618	-1.02143
myometrium contraction	96	93	0.00650417	-1.04118
heart resistance	12	12	0.00654251	1.39883
relaxation	522	502	0.0066672	1.01032
endothelial cell differentiation	89	85	0.00671464	1.03806
vascularization	1545	1395	0.00687377	-1.04478
dopamine metabolism	35	34	0.00718506	1.0226
kidney filtration	77	76	0.00735091	1.07849
striatal dopamine release	36	36	0.00739242	1.1935
microglial activation	225	218	0.00763245	1.0036
diaphragm contraction	5	5	0.00767551	1.48929
eating behavior	344	327	0.00795185	-1.01095
proestrus	65	64	0.00797236	-1.05049
astrocyte swelling	12	12	0.0083258	-1.28835
adipocyte differentiation	394	367	0.0085361	-1.11153
ion transport	206	204	0.00877088	-1.03894
dopaminergic system	43	42	0.00882265	-1.08863
appetite	162	160	0.00883412	1.02297
mast cell degranulation	164	158	0.00907112	-1.06386
vasopressin secretion	44	44	0.00916672	-1.14491
intracellular signaling cascade	128	126	0.00917776	-1.04121
AMP metabolism	6	6	0.00937347	1.67246
peritoneal macrophage function	10	10	0.00974404	1.32689
epithelial cell interaction	29	28	0.0102007	1.03326
endothelial cell activation	139	138	0.0102059	-1.02915
immunoreactivity	463	449	0.0105928	-1.02449
contractile activity	332	324	0.0105935	-1.0237
tissue invasion	69	66	0.0106611	-1.13921
cholinergic synaptic transmission	55	53	0.0107296	1.12476
kidney development	135	128	0.010785	1.00921
thyroid function	71	67	0.0108411	1.01239
platelet function	168	160	0.0111036	1.03594
dedifferentiation	262	253	0.0111372	-1.07677
kidney retention	10	10	0.0111564	-1.23545
testis descent	12	11	0.0113166	-1.3457
podocyte permeability	28	27	0.0118744	1.00752
neutrophil chemotaxis	169	158	0.0121845	1.08838
gland morphogenesis	20	17	0.012292	-1.16153
quiescence	261	249	0.0123314	-1.13492
muscle morphogenesis	6	6	0.0125741	-1.35403
artery development	29	28	0.0126334	-1.02658
inflammatory response	1087	1001	0.0129827	-1.04936
vein relaxation	9	9	0.0131342	-1.45493
gastrointestinal function	29	28	0.0133281	-1.05844
stomach function	31	31	0.0133513	1.02313
vasculature development	20	18	0.0135376	-1.09741
growth hormone secretion	116	110	0.0137483	1.00714
response to acid	8	8	0.0142274	-1.45493
myoblast proliferation	108	102	0.014276	-1.09309
phosphoinositide metabolism	42	41	0.0143927	1.1389
protein-protein cross-linking via L-cystine	75	71	0.0145359	1.00752
umbilical blood flow	10	10	0.0152048	1.22558
endothelialization	66	64	0.0152322	1.0182
acidification	236	229	0.0155	-1.04087
endothelial cell response	60	58	0.0156269	-1.01285
adrenal secretion	11	11	0.0159137	-1.14491
lymph circulation	31	31	0.0159172	1.04183
neurotransmitter secretion	258	250	0.0160833	1.01532
monocyte adhesion	216	203	0.0161643	-1.01285
sperm entry	25	25	0.0162761	-1.17954
striatal dopaminergic pathways	9	9	0.0165631	-1.35265
somitogeneses	65	65	0.0165742	-1.05887
regulation of cell volume	143	139	0.0166601	-1.0879
osteoclast function	170	164	0.0166643	1.00714
eye movement	109	106	0.0167381	-1.08517
long-term synaptic potentiation	386	373	0.0169128	-1.01327
immune system function	338	310	0.0169857	-1.06093
regulated secretory pathway	24	24	0.0171518	-1.07097
proteolysis	8	8	0.0176249	-1.4707
heart contraction	216	211	0.0177855	-1.01326
gastric motility	65	65	0.0180995	-1.04542
penile erection	67	67	0.0185089	-1.06989
agglutination	67	56	0.0186866	1.10937
heart function	484	470	0.0190484	-1.02658
cardiovascular changes	55	54	0.019323	-1.0054
hippocampal function	55	52	0.0197527	-1.05844
retina blood flow	27	26	0.0197594	-1.07906
monocyte chemotaxis	120	116	0.0198797	1.02297
lymphatic vessel function	5	5	0.0199009	1.24617
gall bladder motility	37	36	0.0200235	1.02313
gall bladder emptying	9	9	0.0202309	1.1028
macrophage activation	303	290	0.0203174	1.00191
bladder contraction	35	34	0.02043	1.27699
retina sensitivity	7	6	0.020658	1.62843
biliary flow	39	39	0.021042	-1.13414
genital development	11	11	0.0210509	1.31608
heart muscle growth	5	5	0.021582	-1.36129
cellular alkalinization	38	38	0.0216537	-1.06989
fluid transport	63	63	0.0217987	-1.04121
Steroid metabolism	322	311	0.0219407	-1.0737
carbohydrate metabolism	111	108	0.0220763	-1.01959
ear development	21	20	0.0220957	-1.06723
ovarian follicle development	88	87	0.0222095	-1.05049
lymphocyte adhesion	93	89	0.0223852	-1.03999
adrenocortical secretion	14	13	0.022688	-1.14491
intramembranous ossification	16	14	0.0229119	1.15499
locomotion	477	458	0.0230594	-1.03388
cardiovascular reflex	14	14	0.0235447	-1.19803
cation transport	31	31	0.0238546	-1.11866
capillary permeability	121	117	0.0238838	-1.00917
reproductive behavior	35	32	0.0238924	-1.05844
estrus	69	68	0.0238933	-1.14741
nervous system physiology	49	49	0.0244301	1.06441
colorectal motility	55	55	0.0244907	-1.01469

## Sheet: Appendix 4B
Appendix 4B - SNEA diease analysis
Gene Set Seed	Total # of Neighbors	# of Measured Neighbors	Median change	p-value
Fistula	27	25	-1.11137	7.06004e-05
Vomiting	49	41	-1.14491	9.75607e-05
Hyponatremia	29	24	1.30346	0.000262605
Hypertension, Renal	32	27	-1.17026	0.000381679
Corneal Neovascularization	109	96	-1.03598	0.000513261
Uremia	36	33	-1.13546	0.000548424
Duodenal Ulcer	40	34	-1.21628	0.000572688
Skin Wrinkling	21	21	1.25951	0.00060971
Purpura, Thrombocytopenic	9	7	-1.64738	0.000625466
arteriolopathy	10	9	1.3832	0.000805144
eye vascularization	23	22	1.25544	0.000934641
Aortic Aneurysm, Abdominal	85	76	-1.04127	0.00111673
Sclerosis	99	88	1.0255	0.00113242
Stereotyped Behavior	44	43	-1.14491	0.00129031
Stomach Ulcer	82	73	1.12214	0.00136931
Arterial stiffness	32	26	1.22141	0.0014974
Ventricular Fibrillation	43	39	-1.17026	0.001742
Hypokalemia	27	25	-1.16373	0.00183298
urine flow	49	47	-1.04723	0.00184597
Aortic Valve Stenosis	26	25	-1.08584	0.00189579
vein passage	19	18	-1.18461	0.0019029
Dyspnea	23	20	-1.23545	0.00196522
Water Intoxication	6	6	1.39132	0.00220064
Thirst	24	22	-1.20405	0.00235334
Retinal Neovascularization	110	94	-1.03598	0.00258326
inflammatory lesions	58	49	-1.19849	0.00271285
Cachexia	76	66	1.04169	0.00301752
STEMI	11	8	-1.27199	0.00327026
Peritoneal Fibrosis	28	25	-1.13546	0.00347443
Depression	37	34	-1.10006	0.00359191
Hyperalgesia	261	242	-1.04853	0.00367741
heart rate	235	211	-1.07248	0.00368313
Albuminuria	121	105	1.12971	0.00407472
Malignant Hyperthermia	6	5	1.643	0.00420596
Anxiety	178	159	-1.1118	0.00434428
heart index	33	29	-1.15137	0.00443391
artery stenosis	78	71	1.00087	0.0044952
effective renal plasma flow	15	12	1.22141	0.00493231
Hypertension, Malignant	16	15	-1.17026	0.00499942
Obstetric Labor, Premature	56	47	-1.28835	0.00516157
Cutis Laxa	26	24	1.14916	0.00552041
Extravasation of Diagnostic and Therapeutic Materials	272	239	1.00087	0.00571258
Achlorhydria	8	8	-1.27071	0.00582245
vascular pressure	14	13	-1.15385	0.00591251
Hypocapnia	9	8	-1.38129	0.00624854
hemodynamic abnormalities	16	12	1.36877	0.00635027
Brain Edema	104	95	-1.09291	0.00645313
Cicatrix, Hypertrophic	29	26	-1.26152	0.00690481
Heart Arrest	45	42	1.17435	0.00691379
Torsades de Pointes	13	11	-1.25804	0.00702324
wedge pressure	12	11	-1.52466	0.0072154
bone size	15	14	1.4253	0.0078144
Giant Lymph Node Hyperplasia	11	9	-1.23333	0.00783093
Hemangiosarcoma	21	20	1.36175	0.00783226
Granuloma	141	118	-1.0268	0.00792504
muscle dysfunction	14	12	1.17896	0.00797391
Marfan Syndrome	15	15	1.29124	0.00798943
cardiovascular tone	221	199	1.00087	0.00810696
Rupture	192	167	-1.03598	0.00824574
Lung Diseases	184	160	-1.12634	0.00848848
metabolic alkalosis	12	12	-1.34459	0.00850177
blood volume	51	45	-1.13566	0.00857567
lung inflation	10	9	1.35326	0.00867021
artery diameter	22	21	-1.15385	0.00870624
Death, Sudden	49	47	-1.21798	0.00908101
capillary diameter	5	5	1.35259	0.00918376
skin damage	15	14	1.46892	0.00930872
Cataplexy	7	7	1.47001	0.00957887
bronchoconstriction	110	95	-1.02928	0.00986834
left ventricular function	104	94	1.03536	0.0100114
Hyperandrogenism	31	27	-1.14491	0.0100605
Cholestasis	102	91	-1.12343	0.0102986
Myelitis	10	8	-1.28835	0.0104077
Vasoplegia	6	6	-1.28835	0.0107466
kidney mass	27	25	-1.21628	0.0109939
Osteoarthritis, Knee	18	15	-1.2139	0.0110769
Multiple System Atrophy	14	12	-1.25953	0.0111221
Pure Autonomic Failure	7	5	-1.2734	0.0113366
Apnea	46	42	-1.04535	0.0115442
alveolar enlargement	13	13	1.21302	0.0115711
Emphysema	96	83	-1.12482	0.0116693
Typhoid Fever	8	6	-1.49689	0.0119336
lung lesion	20	18	1.09754	0.0120649
macrophage infiltration	171	152	-1.02965	0.0124214
stomach erosions	16	16	-1.18696	0.0125773
cardiovascular infiltration	7	6	1.46892	0.0126816
Enteritis	41	37	-1.15678	0.0128746
airway hyperreactivity	243	206	1.00629	0.0134507
Urinary volume	9	8	1.14693	0.0138979
Lupus Erythematosus, Cutaneous	10	9	-1.28835	0.0141949
hypoperfusion	40	35	-1.22723	0.0142204
Sarcoidosis, Pulmonary	14	13	-1.27469	0.0143585
Corneal Opacity	30	23	1.07791	0.0145293
Staphylococcal Infections	6	6	1.36102	0.014757
Hypertension, Pregnancy-Induced	18	17	-1.28835	0.0150822
influenza-like illness	8	7	-1.18696	0.0160174
Encapsulating Peritoneal Sclerosis	9	7	1.3832	0.0161333
Cerebral Amyloid Angiopathy	17	16	-1.22723	0.0162077
Arthritis, Psoriatic	25	19	1.17401	0.016274
Heart Murmurs	8	7	-1.24736	0.0164571
Diabetic Retinopathy	116	100	-1.01059	0.0165367
Retinopathy of Prematurity	22	17	-1.07651	0.0165891
hematocrit	58	48	-1.11174	0.0166346
Hypoalgesia	22	20	1.08546	0.0168364
Hypertension, Pulmonary	200	181	-1.06945	0.0169654
Diabetic Angiopathies	55	46	1.13838	0.0169836
vascular endothelial damage	129	120	-1.0915	0.0173635
Tachycardia	110	102	1.07942	0.0178549
Leprosy, Lepromatous	6	5	1.50306	0.0189163
blood viscosity	14	11	-1.24931	0.0190507
Dystonic Disorders	9	5	1.34806	0.0191655
Edema	344	305	1.00714	0.0191884
Amyloidosis	69	54	-1.14491	0.0196275
neutrophil recruitment	222	180	1.06441	0.0198016
Macular Edema	10	9	1.22141	0.0200119
Diabetes Complications	57	52	-1.07248	0.0202929
Keratoconus	9	7	1.21772	0.0203762
Postural Orthostatic Tachycardia Syndrome	6	6	1.39883	0.0204403
Keratitis	77	59	1.01805	0.0205622
Prostatitis	15	13	-1.18696	0.020927
Ventricular Premature Complexes	10	10	-1.39653	0.0209906
Hypertension, Renovascular	21	20	1.22286	0.0211815
Choroidal Neovascularization	95	83	-1.00084	0.0214976
Movement Disorders	26	25	1.21084	0.0217138
Muscular Disorders, Atrophic	14	12	-1.2532	0.021904
alveolar remodeling	20	16	1.21774	0.0221149
left ventricular diastolic dysfunction	13	12	-1.18461	0.0223317
Spondylarthropathies	12	9	1.2287	0.0224407
Eczema	17	15	-1.26676	0.0231176
Hypotension	216	198	1.0148	0.0234716
vein pressure	27	25	-1.15385	0.0239119
Purpura, Thrombotic Thrombocytopenic	18	17	-1.39723	0.0239745
bone strength	21	16	1.23725	0.0242136
artery pressure	178	163	-1.02928	0.0242894
ventricular tachycardia/ventricular fibrillation	5	5	-1.43544	0.0244524
Muscle Rigidity	26	23	-1.1853	0.024485
cardiovascular volume	12	11	-1.11137	0.0252598
left ventricular ejection fraction	46	41	-1.14491	0.0252653
skin fibrosis	56	52	1.08905	0.0252989
Death, Sudden, Cardiac	39	39	1.06181	0.0261037
Hydronephrosis	25	22	1.02474	0.0261729
Aortic Coarctation	12	11	-1.14477	0.0262095
Bradycardia	118	105	-1.09291	0.0264251
Diastolic Dysfunction	52	49	-1.0915	0.0264436
Narcosis	8	8	1.38293	0.0265691
Pulmonary Disease, Chronic Obstructive	164	134	1.03536	0.0269863
atrial depression	33	28	-1.04694	0.0272051
Colitis, Ischemic	5	5	1.15875	0.0273968
kidney resistance	16	15	-1.15385	0.0273978
Bites and Stings	7	6	-1.28835	0.0275369
Periodontitis	54	50	-1.07677	0.027637
Corneal Diseases	38	29	-1.04478	0.0278626
tibial dyschondroplasia	5	5	1.32697	0.0281891
kidney infiltration	5	5	-1.12033	0.0282863
astrocyte dysfunction	5	5	1.39835	0.0284041
Gingival Overgrowth	20	20	-1.13566	0.0287173
Lung Diseases, Obstructive	10	7	-1.27469	0.0289504
cardiovascular passage	91	75	-1.07248	0.0290514
Brain Injuries	322	284	-1.09651	0.0290517
fibroblast phenotype	72	67	-1.11137	0.0293218
Retrograde Degeneration	9	8	1.13261	0.0294144
Hypochlorhydria	9	9	-1.26152	0.0298798
Contusions	24	21	-1.04694	0.0299663
Pain	359	326	1.00434	0.0300112
Leukomalacia, Periventricular	6	6	1.59362	0.0304231
Poxviridae Infections	7	6	1.2287	0.0306296
Seizures	313	281	-1.00201	0.030697
Leukostasis	29	27	-1.18554	0.0313388
Hypovolemia	39	35	-1.15524	0.0313774
Liver Cirrhosis	141	128	-1.08584	0.0319179
Lung Diseases, Interstitial	48	37	1.03536	0.0320564
Menorrhagia	7	7	1.3832	0.0321504
Nystagmus, Pathologic	8	7	1.19442	0.0322289
Fibrosis	579	509	-1.06186	0.0322375
podocyte infiltration	33	28	1.22141	0.0324261
Latent Tuberculosis	5	5	-1.28835	0.0325306
Muscle Hypertonia	13	12	1.2557	0.0326675
muscle injury	234	208	-1.01326	0.0326834
portal pressure	25	24	-1.12627	0.0329519
Carotid Artery Injuries	23	20	1.03557	0.0334608
Critical Illness	23	20	-1.15385	0.0337573
eye pressure	126	116	-1.14491	0.0340231
Basal Ganglia Diseases	11	9	1.16031	0.0342212
Alcohol Drinking	107	92	-1.07248	0.0342974
Glaucoma	88	77	-1.13722	0.0343086
Pneumonia	388	322	-1.02928	0.0343381
Arthritis	497	390	1.01486	0.0348975
heart morphology	23	21	1.20231	0.0350863
Syncope	10	8	1.22126	0.035692
Brain Infarction	41	37	-1.07749	0.0357553
hyperchylomicronemia	6	5	1.14122	0.0358211
Esophagitis	20	16	-1.26152	0.0361472
artery distensibility	7	7	-1.39884	0.0365518
Sleep Disorders	17	15	-1.13899	0.0365774
neutrophil accumulation	146	126	-1.07749	0.036698
head size	18	14	1.32427	0.0367595
Erythroblastosis, Fetal	5	5	1.69491	0.0368061
Yawning	20	18	-1.14491	0.0368647
lung morphology	26	23	-1.01227	0.0368752
joint degeneration	110	93	-1.0255	0.0369704
Ileus	26	23	-1.1853	0.0376775
Inflammatory Stress	18	14	-1.19722	0.0377577
plasma volume	23	20	1.09534	0.0379471
Radicular Cyst	8	8	1.39835	0.0384745
Shock	40	36	1.05129	0.0388192
Angioedema	23	19	-1.02965	0.0388864
Arteriovenous Fistula	23	22	1.25607	0.0388931
Weight Gain	179	162	-1.09792	0.0394831
Bronchiectasis	16	14	-1.28835	0.0395798
Rupture, Spontaneous	6	6	1.10937	0.0396627
Hyperkalemia	22	21	-1.03894	0.0399509
Spinal Injuries	6	5	-1.45136	0.0400042
skin wrinkling	16	13	1.00711	0.0408247
Cicatrix	183	161	-1.08139	0.0408545
vascular stiffness	16	13	1.22141	0.0408592
Lethargy	9	9	-1.28835	0.0408696
Osteoporosis	124	108	-1.13575	0.0408717
Flushing	32	26	1.14878	0.0409364
urine osmolality	27	26	-1.16373	0.0409474
Cryptogenic Organizing Pneumonia	11	11	-1.03598	0.0410048
Porphyrias	12	12	-1.0945	0.0412013
Paraproteinemias	16	14	1.04429	0.0413258
Migraine with Aura	6	5	1.24478	0.0413664
renal plasma flow	32	28	1.04183	0.0417246
Glycosuria	13	11	-1.42523	0.042233
Mitral Valve Stenosis	49	46	-1.11887	0.0424351
thyroid dysfunction	18	16	1.25432	0.0427994
vascular hyperreactivity	6	6	1.36877	0.0428406
Coronary Occlusion	46	44	1.12449	0.0428919
diabetic erectile dysfunction	7	7	1.22141	0.0431152
Aneurysm	87	76	-1.0412	0.0432871
Hyperamylasemia	9	6	1.17166	0.0435666
Vasculitis	65	53	-1.12033	0.043568
Diabetic Nephropathies	216	195	-1.0915	0.043603
Systemic Inflammatory Response Syndrome	37	31	-1.14491	0.043684
cardiovascular calcification	59	53	-1.07248	0.043712
Peptic Ulcer	22	20	1.04183	0.0437608
Diarrhea	145	124	-1.06743	0.0439487
embryotoxicity	20	16	-1.18696	0.0441616
microvessel density	100	88	1.03018	0.0442649
Nephrosclerosis	18	15	-1.17026	0.0444239
Azotemia	6	5	1.36877	0.0445439
Endophthalmitis	7	6	-1.26676	0.0445534
Chronic Disease	60	47	-1.17692	0.044788
Heart Failure, Diastolic	15	14	-1.16373	0.0448566
Pneumoperitoneum	5	5	1.25303	0.0454396
Renal Insufficiency, Acute	5	5	1.36877	0.0459179
Gastroparesis	14	13	-1.15385	0.045931
testis size	20	18	1.21674	0.0465351
primary central nervous system lymphoma	12	9	1.26704	0.0469761
diastole	14	14	1.01175	0.0469799
Arteritis	26	23	-1.19722	0.0473642
organ failure	69	57	-1.04694	0.0478404
Carcinoid Tumor	45	40	1.03557	0.0479333
Sarcopenia	19	17	-1.29049	0.0480699
Urinary Bladder, Overactive	36	34	-1.13492	0.04842
Otitis Media with Effusion	29	25	1.17166	0.0484247
Blood Loss, Surgical	10	7	1.56917	0.0485265
Prostatic Diseases	11	9	-1.38782	0.0489009
Renal Artery Obstruction	12	10	1.36877	0.0498501
